# Supplementary material for: Electron-Beam-Induced Fluorination Cycle for Long-Term Preservation of Graphene under Ambient Conditions
Source: MDPI journal article supplement (doi:10.3390/nano12030383), 2022-01-24
Supplement: s1 [file s1]

# Electron-Beam-Induced Fluorination Cycle for Long-Term Preservation of Graphene under Ambient Conditions

Tianbo Duan <sup>1</sup>, Hu Li <sup>1,2</sup> and Klaus Leifer <sup>1,\*</sup>

<sup>1</sup> Ångström Laboratory, Department of Materials Science and Engineering, Uppsala University, 75121 Uppsala, Sweden; Tianbo.Duan@angstrom.uu.se (T.D.); Hu.Li@angstrom.uu.se (H.L.)

<sup>2</sup> Shandong Technology Centre of Nanodevices and Integration, School of Microelectronics, Shandong University, Jinan 250101, China

\* Correspondence: Klaus.Leifer@angstrom.uu.se

## Electronic supplementary information

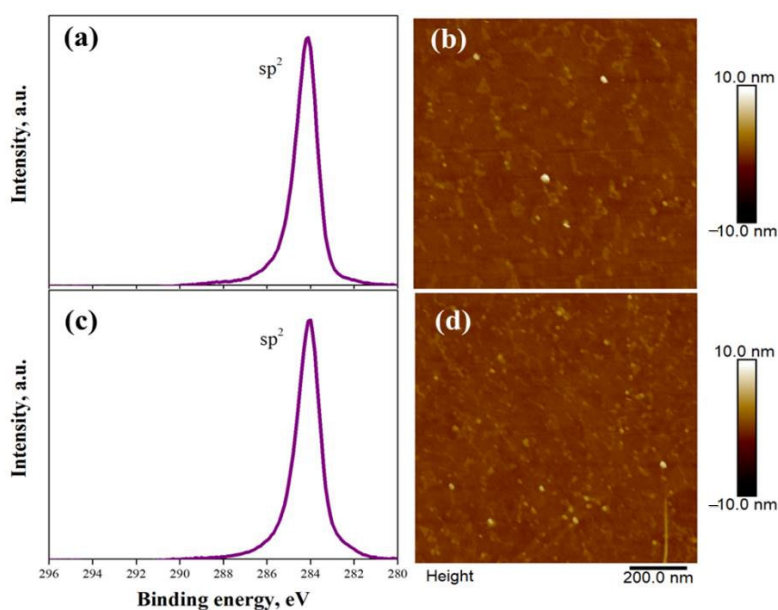

**Figure S1.** (a) and (c) are C1s XPS spectra of defluorinated graphene experienced the same fluorination/defluorination cycle and (b) and (d) are corresponding AFM images, respectively.

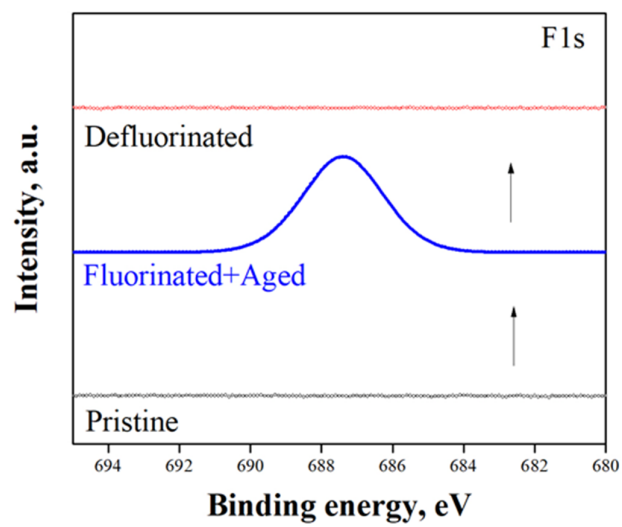

**Figure S2.** F1s XPS spectra of graphene sample at different fluorination/defluorination stage.
